# Supplementary material for: The Phenotype of Circulating Follicular-Helper T Cells in Patients with Rheumatoid Arthritis Defines CD200 as a Potential Therapeutic Target
Source: Hindawi journal article supplement (doi:10.1155/2012/948218), 2012-01-01

Supplementary Figure 1

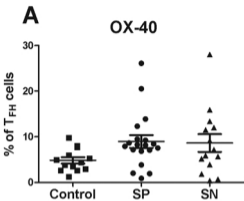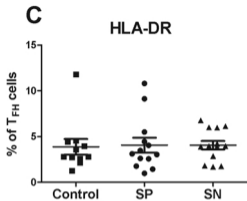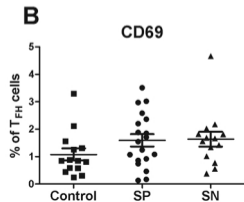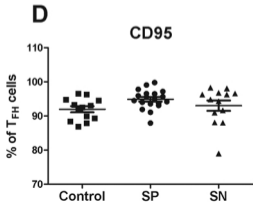

Supplement: f1 [file 948218.f1.pdf]
